## 5-HYDROXYTRYPTAMINE: A SECOND DIURETIC HORMONE IN *RHODNIUS PROLIXUS*

By S. H. P. MADDRELL<sup>1</sup>, W. S. HERMAN<sup>2</sup>, R. L. MOONEY<sup>3</sup> AND  
J. A. OVERTON<sup>1</sup>

<sup>1</sup>Department of Zoology, Downing Street, Cambridge, CB2 3EJ, England,  
<sup>2</sup>Department of Genetics and Cell Biology, University of Minnesota, St Paul,  
MN 55414, USA and <sup>3</sup>School of Medicine, Medical College of Virginia,  
Richmond, VA 23298-1092, USA

Accepted 26 October 1990

### Summary

Bioassays of 5-hydroxytryptamine (5-HT) in fifth-instar *Rhodnius prolixus* haemolymph using *Calliphora* salivary glands indicate that: (1) biologically active 5-HT is present, (2) in unfed animals there is not enough 5-HT to stimulate Malpighian tubule fluid secretion, and (3) there is enough 5-HT soon after the initiation of feeding to stimulate rapid tubule secretion. The 5-HT receptor antagonists ketanserin and spiperone reversibly and selectively inhibit 5-HT-induced fluid secretion, indicating the presence of specific 5-HT receptors on *Rhodnius* Malpighian tubules. The data provide evidence that 5-HT is a naturally occurring hormone acting with a previously described peptide hormone to regulate diuresis in this species.

### Introduction

Diuresis in the blood-sucking bug *Rhodnius prolixus* Stål was first shown to be under the control of a diuretic hormone (DH), secreted by neurosecretory cells in the mesothoracic ganglionic mass and acting on the Malpighian tubules to produce very rapid fluid secretion (Maddrell, 1963). Later, it emerged that 5-hydroxytryptamine (5-HT, serotonin) would stimulate rapid fluid secretion by *in vitro* preparations of the Malpighian tubules (Maddrell *et al.* 1969, 1971). The neurosecretory DH was shown to be a peptide hormone (Aston and White, 1974). At that time it was considered that the stimulatory effect of 5-HT on Malpighian tubule fluid secretion was pharmacological rather than physiological, with 5-HT mimicking the action of DH, perhaps by interacting with DH receptors on the tubule cells (Maddrell *et al.* 1971). It had been argued that amines might in some situations be able to interact with receptors for peptide hormones in cases where the side chains of amino acids in the peptide chain occupied spatially similar positions to the component groups of the amine mimic (Maddaiah, 1969).

Key words: serotonin, 5-hydroxytryptamine, 5-HT, ketanserin, spiperone, *Rhodnius prolixus*, Malpighian tubules, insect diuretic hormones.

Recently, chemical analysis has shown that, during feeding in *Rhodnius*, 5-HT increases rapidly in concentration in the haemolymph from the low values found in the resting insect (Lange *et al.* 1989). It reaches a peak concentration of about  $10^{-7}$  mol l<sup>-1</sup> after 5 min and then steadily declines to a lower level by 1 h after the start of feeding (Lange *et al.* 1989). The peak concentration would be sufficient to cause considerably elevated rates of fluid secretion by the isolated Malpighian tubules (Maddrell *et al.* 1971). This finding raises the exciting possibility that 5-HT plays a hormonal role in controlling fluid secretion by the Malpighian tubules. Crucially, however, it was not clear from the chemical measurements of 5-HT levels in whole blood (Lange *et al.* 1989) whether 5-HT was free in the haemolymph and able to interact with the Malpighian tubules; conceivably much of the 5-HT could be contained within the blood cells or be present in a conjugated form and so be unavailable to the tubules. In the rabbit, for example, 5-HT in whole blood is largely confined to the platelets, where its concentration is 25 000 times higher than in the plasma (Da Prada and Picotti, 1979).

In the present paper, we present evidence to show (1) by bioassay that free 5-HT does appear at physiologically relevant concentrations in the haemolymph of fed *Rhodnius* and (2) that Malpighian tubules possess specific 5-HT receptors separate and distinct from those for DH. These results, we believe, provide strong evidence that 5-HT acts as a hormone controlling diuresis in *Rhodnius*.

### Materials and methods

*Rhodnius prolixus* and *Calliphora vicina* were obtained from laboratory cultures maintained in the Zoology Department of Cambridge University. The upper (distal) fluid-secreting parts of the Malpighian tubules were dissected from fifth-instar *Rhodnius* 1–2 weeks after moulting. The tubules were placed in suitably sized drops of *Rhodnius* saline (Maddrell *et al.* 1988) containing appropriate concentrations of 5-HT or other agents, and their secretion was monitored under liquid paraffin (mineral oil) for up to 1 h (Maddrell *et al.* 1988). Salivary glands were dissected from adult female *Calliphora* 1–2 weeks after eclosion and their secretory activity was measured by techniques identical to those used for examining *Rhodnius* tubules. Dissections of salivary glands were performed in *Calliphora* saline (Berridge and Patel, 1968).

To study by bioassay the effect of feeding on 5-HT levels in haemolymph, fifth-instar *Rhodnius* were allowed to feed artificially for 5 min on saline containing  $1 \text{ mmol l}^{-1}$  ATP at 37°C (Friend and Cartwright, 1963). Haemolymph was obtained from both fed and unfed animals by rapid bleeding from 1–2 cut legs, the volume was measured, and then the haemolymph was diluted 10 and 100 times with *Calliphora* saline. Salivary glands were first incubated for 10 min in that saline, to demonstrate that there was no secretion from unstimulated glands. Thereafter, secretory rate was monitored in 1% and then 10% haemolymph dilutions for 10 min and then each gland was placed in  $10^{-6}$  mol l<sup>-1</sup> 5-HT for 10 min to determine the maximal rate of secretion. Only data from glands showing no

secretion in saline, a higher response in 10 % than in 1 % haemolymph, and a high rate of secretion in  $10^{-6}$  mol l<sup>-1</sup> 5-HT were included in this study. This procedure allowed us to determine both the rate of secretion and the percentage of the maximal rate for each gland. The effectiveness of this bioassay relies on the fact that 5-HT is a very effective stimulator of *Calliphora* salivary glands at concentrations as low as  $10^{-9}$  mol l<sup>-1</sup> (Berridge and Patel, 1968; Berridge, 1970), and it is known to be the *in vivo* regulator of those glands (Trimmer, 1985). No other substance produced by *Rhodnius* is known to stimulate salivary glands (S. H. P. Maddrell, unpublished results) but, to establish that the glands in our bioassay were reacting to the presence of 5-HT, we treated stimulated salivary glands with gramine, an effective and specific competitive inhibitor of 5-HT action on the glands (Berridge, 1972).

To produce extracts rich in the peptide DH, we dissected mesothoracic ganglionic masses from fifth-instar *Rhodnius* (Maddrell, 1963), homogenized them in distilled water, sonicated the extracts for 30 s, and made them up to the required dilution in saline.

5-HT (creatinine sulphate complex), cyclic AMP (adenosine 3',5'-cyclic monophosphoric acid) and spiperone were obtained from Sigma, gramine [3-(dimethylaminomethyl)-indole] from Aldrich, and ketanserin tartrate from Cambio, Cambridge. The latter three compounds were initially dissolved in 100 % ethanol and subsequently diluted with *Rhodnius* saline. Data are presented as mean  $\pm$  S.E.M. Statistical analysis used Student's *t*-test. In this report the term significant refers to statistical significance in that test at  $P < 0.05$ . All determinations of tubule or salivary gland secretion were conducted at room temperature (21–25 °C).

## Results

### *5-HT activity in Rhodnius haemolymph*

We examined the ability of haemolymph from fed and unfed fifth-instar *Rhodnius* to stimulate secretion by *Calliphora* salivary glands (Table 1). Haemo-

Table 1. *Stimulation of Calliphora salivary gland secretion by Rhodnius haemolymph*

| Condition      | <i>N</i> | Rate<br>(nl min <sup>-1</sup> ) | Percentage<br>of<br>maximum | Estimated<br>[5-HT]<br>(mol l <sup>-1</sup> $\times 10^8$ ) |
|----------------|----------|---------------------------------|-----------------------------|-------------------------------------------------------------|
| Unfed          | 18       | 2.6 $\pm$ 1.4                   | 8.0 $\pm$ 2.5               | 1.5 $\pm$ 0.3                                               |
| Fed for 5 min  | 19       | 10.1 $\pm$ 2.3                  | 33.7 $\pm$ 6.6              | 5.1 $\pm$ 1.7                                               |
| Fed for 60 min | 12       | 2.1 $\pm$ 1.2                   | 5.1 $\pm$ 2.9               | 1.2 $\pm$ 0.2                                               |

*N*, number of salivary glands examined; secretion rate is given for the first 10 min of incubation in 10 % haemolymph dilution; the percentage of maximum rate was determined from tubule responses to  $10^{-6}$  mol l<sup>-1</sup> 5-HT.

lymph from unfed *Rhodnius* stimulated low levels of salivary gland secretion, whereas that from animals fed for 5 min stimulated secretion at 3.9 times the rate observed for unfed animals. Haemolymph obtained 60 min after the initiation of feeding stimulated low levels of salivary gland activity.

*Estimated 5-HT titres in fifth-instar larvae*

To estimate 5-HT levels in *Rhodnius* haemolymph, we first determined the dose-response relationship of 5-HT and salivary gland secretion in our experimental conditions (Fig. 1). Maximal secretion occurred at doses above  $3 \times 10^{-8} \text{ mol l}^{-1}$  and no response was observed with 5-HT at less than  $10^{-9} \text{ mol l}^{-1}$ ; these values are similar to, but somewhat higher than, those obtained by Berridge (1970). We then used the secretion rate observed in 10% haemolymph to determine the percentage of the maximum response obtained in each haemolymph sample, and used that data and the dose-response curve to estimate the amount of 5-HT present in each haemolymph sample.

Our bioassays indicated significantly higher 5-HT titres (3.4 times) within a few minutes after the initiation of feeding (Table 1). Considerable variation was observed in these bioassays; haemolymph from 22% of animals fed for 5 min and 69% of the others produced no response. All of the unresponsive animals were assumed to have haemolymph titres of  $0.9 \times 10^{-8} \text{ mol l}^{-1}$  5-HT, since after 10-fold dilution that would be the highest value that would not be detected in our system (see Fig. 1).

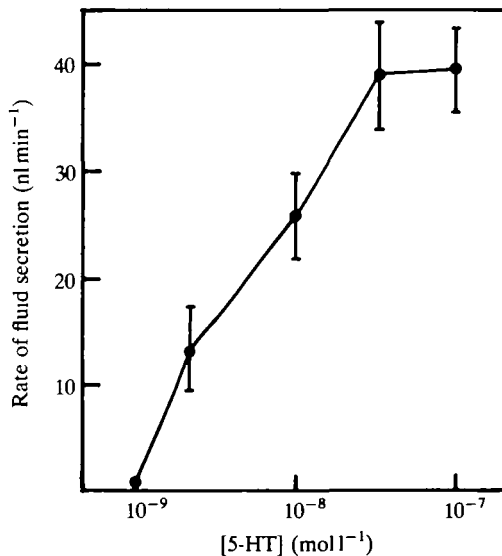

Fig. 1. Dose-response relationship for 5-hydroxytryptamine (5-HT) action on *Calliphora vicina* salivary glands. Rates were determined for the first 10 min of stimulation in 50  $\mu\text{l}$  saline drops. Each point is the mean value determined from an average of 13 observations. Bars show  $\pm 1$  s.e.m.

*Stimulation of Calliphora salivary glands affected by gramine*

Although we believed in the above experiments that we were measuring 5-HT levels in haemolymph, the possibility existed that some other substance might be responsible for the observed stimulation of salivary glands. To test this possibility we used gramine, an effective competitive inhibitor of 5-HT stimulation of *Calliphora* salivary glands (Berridge, 1972). 15–20  $\mu\text{l}$  samples of haemolymph were taken from fifth-instar *Rhodnius* fed for 5 min. They were diluted with an equal volume of saline or with an equal volume of saline containing  $2 \times 10^{-4} \text{ mol l}^{-1}$  gramine. Six glands, each in a 10  $\mu\text{l}$  drop of haemolymph diluted with saline, secreted fluid at a rate of  $21.0 \pm 1.8 \text{ nl min}^{-1}$  during the first 12 min. Six glands, each in a 10  $\mu\text{l}$  drop of haemolymph with gramine at a final concentration of  $10^{-4} \text{ mol l}^{-1}$ , secreted fluid during the first 12 min at a rate of  $3.3 \pm 1.0 \text{ nl min}^{-1}$ , which is more than six times more slowly. From Berridge's (1972) data, inhibition by  $10^{-4} \text{ mol l}^{-1}$  gramine of this extent would be expected in the presence of about  $2 \times 10^{-8} \text{ mol l}^{-1}$  5-HT, corresponding to a concentration of 5-HT in the original samples of haemolymph of about  $4 \times 10^{-8} \text{ mol l}^{-1}$ , which is very similar to our estimates based on secretion in more diluted samples of haemolymph.

*Effect of 5-HT antagonists on Malpighian tubules and salivary glands*

Dose–response curves for ketanserin and spiperone in the presence of 5-HT are shown in Fig. 2. Both substances totally inhibited fluid secretion by Malpighian tubules from fifth-instar larvae when present at  $10^{-5} \text{ mol l}^{-1}$  or more, but ketanserin was about 10 times more effective than spiperone. The data show the reduction in the amount of fluid secreted within 30 min of applying the drugs. This partially obscures the facts that ketanserin at  $10^{-6} \text{ mol l}^{-1}$  stops all fluid secretion

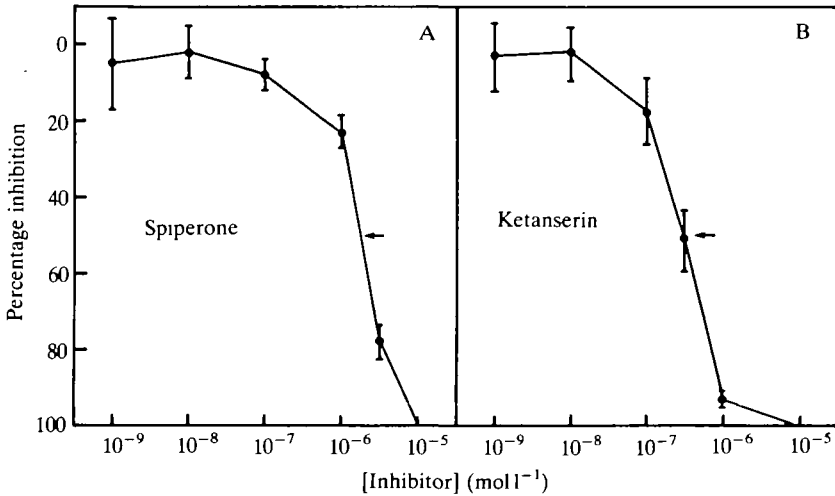

Fig. 2. Dose–response relationships for spiperone (A) and ketanserin (B) inhibition of secretion induced by  $10^{-6} \text{ mol l}^{-1}$  5-HT. Tubules from fifth-instar larvae were bathed in 100  $\mu\text{l}$  drops. Arrows indicate 50% inhibition. Each point is the mean value determined from an average of 10 observations. Bars show  $\pm 1$  s.e.m.

after about 15 min, and that at  $3 \times 10^{-7} \text{ mol l}^{-1}$  ketanserin inhibition is more than 90% complete within 30 min. To test the idea that even lower concentrations of ketanserin might, over still longer times, be effective, we pretreated tubules for 90 min in concentrations of ketanserin lower than  $10^{-7} \text{ mol l}^{-1}$ . None of these tubules was significantly inhibited when subsequently exposed to  $10^{-6} \text{ mol l}^{-1}$  5-HT plus the same low ketanserin concentrations as in the pretreatment.

Secretory activity of inhibited tubules could be restored by removal of inhibitors from the bathing medium (Fig. 3A). Cyclic AMP at  $2.5 \times 10^{-4} \text{ mol l}^{-1}$  rapidly activated the tubules in the presence of inhibitors (Fig. 3B). Data similar to that shown in Fig. 3 were obtained for both antagonists. Clearly, ketanserin and spiperone have no toxic effects on the tubules, but are effective and reversible inhibitors of 5-HT stimulation.

Two kinds of experiments were done to examine the specificity of ketanserin action. The rate of fluid secretion by 5-HT-stimulated *Calliphora* salivary glands was unaffected by high concentrations of ketanserin. In the presence of  $10^{-5} \text{ mol l}^{-1}$  ketanserin, secretion by 5-HT-stimulated ( $10^{-7} \text{ mol l}^{-1}$ ) salivary glands was  $17.2 \pm 5.0 \text{ nl min}^{-1}$  ( $N=4$ ) compared with  $20.7 \pm 3.3 \text{ nl min}^{-1}$  ( $N=4$ ) secreted by control glands in saline containing the same level of 5-HT, but no ketanserin.

Additionally, ketanserin does not affect fluid secretion by Malpighian tubules of *Rhodnius* stimulated with extracts containing the peptide DH. Three tubules in

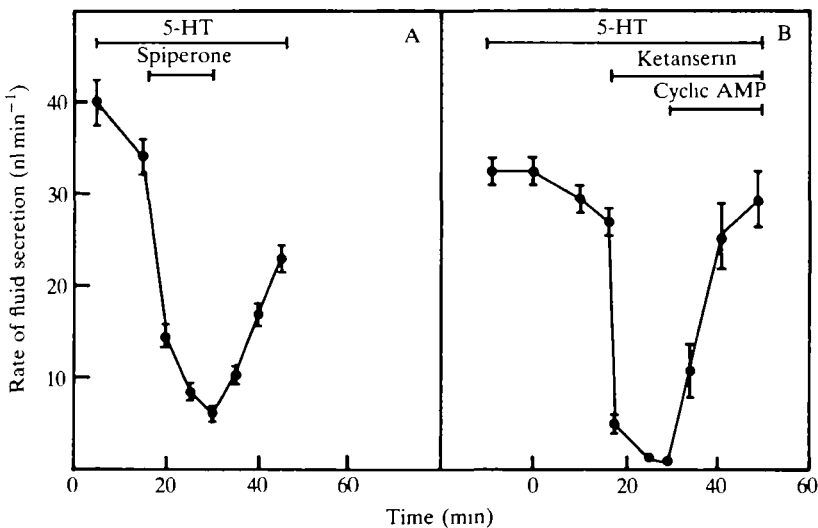

Fig. 3. Reversibility of 5-HT antagonist action. Bars indicate duration of each treatment. (A) The inhibitory effects of  $3 \times 10^{-6} \text{ mol l}^{-1}$  spiperone on secretion by tubules from fifth-instar larvae. Fluid secretion is accelerated when inhibited tubules are returned to saline containing only 5-HT. 75  $\mu\text{l}$  drops;  $N=8$ . (B) The inhibitory effects of  $2 \times 10^{-6} \text{ mol l}^{-1}$  ketanserin on secretion by tubules from fifth-instar larvae. Fluid secretion accelerates when cyclic AMP ( $2.5 \times 10^{-4} \text{ mol l}^{-1}$ ) is added to the bathing drop while ketanserin is still present. 100  $\mu\text{l}$  drops;  $N=4$ . Bars show  $\pm 1 \text{ S.E.M.}$

saline containing 0.2 ganglionic masses per 100  $\mu\text{l}$  and  $10^{-6}\text{ mol l}^{-1}$  ketanserin secreted fluid at  $19.0 \pm 3.3\text{ nl min}^{-1}$ , whereas three tubules in saline containing only DH extract secreted at an identical rate ( $18.9 \pm 6.1\text{ nl min}^{-1}$ ). By contrast, fluid secretion decreased from  $54.3 \pm 4.5\text{ nl min}^{-1}$  ( $N=3$ ) in tubules treated with 5-HT ( $10^{-6}\text{ mol l}^{-1}$ ) to  $1.8 \pm 0.2\text{ nl min}^{-1}$  ( $N=3$ ) in tubules treated with 5-HT plus ketanserin ( $10^{-6}\text{ mol l}^{-1}$ ).

### Discussion

Our data show by bioassay that 5-HT in the haemolymph of fed *Rhodnius* is not confined to the blood cells or present in an inactive form. We find that, 5 min after feeding begins in fifth-instar larvae, 5-HT reaches an effective concentration in the haemolymph of  $5.1 \times 10^{-8}\text{ mol l}^{-1}$ . In unfed insects and in insects 1 h after feeding has begun, the effective concentration is a little above  $10^{-8}\text{ mol l}^{-1}$ . These values are similar to, but somewhat lower than, those determined by chemical means with HPLC by Lange *et al.* (1989), who found that total 5-HT levels in the haemolymph rose from around  $10^{-8}\text{ mol l}^{-1}$  to more than  $10^{-7}\text{ mol l}^{-1}$ . If the differences between our findings and those of Lange *et al.* (1989) are significant, they may indicate that about half the 5-HT in circulation is not free and is perhaps sequestered in blood cells, as happens in mammals (Da Prada and Picotti, 1979). Alternatively, the difference may arise from natural variation between the two stocks of *Rhodnius*. What is clear, however, is that the effective concentration of free 5-HT in the haemolymph of fed *Rhodnius* is sufficient to cause at least partial stimulation of the Malpighian tubules (Maddrell *et al.* 1971).

We find that *Rhodnius* Malpighian tubules have receptors for 5-HT that can be blocked by ketanserin and spiperone, known in vertebrate systems to be specific for a particular subclass of 5-HT receptors (Conn *et al.* 1986; Julias *et al.* 1990). Ketanserin is an effective blocker of 5-HT stimulation of *Rhodnius* Malpighian tubules at all concentrations above  $2 \times 10^{-7}$  to  $3 \times 10^{-7}\text{ mol l}^{-1}$ . The inhibition is rapidly relieved if the tubules are treated with  $2.5 \times 10^{-4}\text{ mol l}^{-1}$  cyclic AMP in addition to ketanserin, so the effects of ketanserin are not caused by non-specific toxicity. Ketanserin is less effective in *Rhodnius* tubules than in several vertebrate systems, where it often has significant effects at  $10^{-8}\text{ mol l}^{-1}$  or less (Conn *et al.* 1986; Julias *et al.* 1990). This may indicate a difference between 5-HT receptors of vertebrates and insects. We believe, nonetheless, that ketanserin is a specific inhibitor of a class of 5-HT receptors in insects, because we find it to be ineffective in blocking 5-HT stimulation of fluid secretion by *Calliphora* salivary glands even at  $10^{-5}\text{ mol l}^{-1}$ , a concentration 30 times higher than that causing virtually complete inhibition of 5-HT stimulation of *Rhodnius* tubules. We have also found that ketanserin-blocked tubules can still be stimulated by extracts of mesothoracic ganglionic masses, which contain the neurosecretory peptide DH. This indicates that the peptide DH acts through a receptor (or receptors) other than the ketanserin-sensitive 5-HT receptor.

So, we have evidence not only of physiologically significant levels of free 5-HT

in the haemolymph of fed *Rhodnius*, but also of specific 5-HT receptors on the Malpighian tubules.

There is evidence that 5-HT is capable of stimulating tubules in all postembryonic stages of *Rhodnius* (Skaer *et al.* 1990; W. S. Herman, J. A. Overton and S. H. P. Maddrell, in preparation). 5-HT is produced by, and released from, a neurosecretory system located in the *Rhodnius* mesothoracic ganglion and associated abdominal nerves (Orchard, 1989), and the 5-HT content of that neurosecretory system is reduced during feeding (Orchard *et al.* 1988). In addition, Montoreano *et al.* (1990) report that 5-HT increases cyclic AMP secretion by isolated *Rhodnius* tubules and 5-HT activates adenylate cyclase in cell membranes isolated from Malpighian tubules of *Rhodnius* fifth-instars (W. S. Herman, R. W. Farndale and S. H. P. Maddrell, in preparation).

The available evidence therefore demonstrates the following in *Rhodnius*. (1) The Malpighian tubules of all postembryonic stages can respond to 5-HT. (2) A system capable of producing and releasing 5-HT is present in the nervous system. (3) 5-HT is released from that system into the haemolymph early in the feeding process. (4) Haemolymph titres of free 5-HT shortly after the onset of feeding are sufficient to stimulate tubule secretion. (5) Elevated haemolymph 5-HT concentration is correlated with an elevated rate of diuresis. (6) Specific 5-HT receptors are present on the tubules. (7) 5-HT stimulates the cyclic AMP second messenger system of tubules. We therefore believe that 5-HT should be considered to be a diuretic hormone acting with the previously described peptide DH to promote rapid postprandial diuresis, at least in fifth-instar *Rhodnius*. Furthermore, it appears likely that both hormones promote rapid diuresis in *Rhodnius* of all post-embryonic stages. The effects of 5-HT on *Rhodnius* Malpighian tubules do not appear to be pharmacological; rather, they reflect a normal physiological function of that substance.

As noted above, circulating levels of 5-HT never appear to be sufficient in themselves to stimulate maximal secretion by *Rhodnius* tubules. Elsewhere we present evidence that the peptide DH and 5-HT act synergistically to promote maximal secretion by Malpighian tubules (W. S. Herman, R. W. Farndale and S. H. P. Maddrell, in preparation). Since several other insect species possess tubules responding to both peptides and 5-HT (Nicolson and Millar, 1983; Morgan and Mordue, 1984; Veenstra, 1988; Coast, 1989), it may be that 5-HT is also acting hormonally (and synergistically?) in such systems. Control of Malpighian tubules by more than one hormone appears to be common in a variety of insect species (Spring, 1990; Wheeler and Coast, 1990).

Our studies with ketanserin and spiperone appear to be the first to use these antagonists to examine the regulation of Malpighian tubules. They suggest that *Rhodnius* Malpighian tubules may possess serotonin receptors similar to those of the 5-HT<sub>2</sub> subclass in vertebrates, since both agents are believed to be specific antagonists of 5-HT<sub>2</sub> receptors. The 5-HT receptors on the salivary glands of *Calliphora* appear to be different; we have found them not to be blocked by ketanserin and they are known to be sensitive to 5-HT concentrations an order of



magnitude lower than those required to stimulate the Malpighian tubules of *Rhodnius* (Berridge, 1972).

We gratefully acknowledge the part played by the late John Treherne in making this collaboration possible, and we thank the AFRC for their support of this work in its initial stages. We also thank John and Charlotte Sparkes for their contributions to this research. Funds to support part of this work were provided by the University of Minnesota.

### References

- ASTON, R. J. AND WHITE, A. F. (1974). Isolation and purification of the diuretic hormone from *Rhodnius prolixus*. *J. Insect Physiol.* **20**, 1673–1682.
- BERRIDGE, M. J. (1970). The role of 5-hydroxytryptamine and cyclic AMP in the control of fluid secretion by isolated salivary glands. *J. exp. Biol.* **53**, 171–186.
- BERRIDGE, M. J. (1972). The mode of action of 5-hydroxytryptamine. *J. exp. Biol.* **56**, 311–322.
- BERRIDGE, M. J. AND PATEL, N. G. (1968). Insect salivary glands: stimulation of fluid secretion by 5-hydroxytryptamine and adenosine 3',5'-monophosphate. *Science* **162**, 462–463.
- COAST, G. M. (1989). Stimulation of fluid secretion by single isolated Malpighian tubules of the house cricket, *Acheta domesticus*. *Physiol. Entomol.* **14**, 21–30.
- CONN, P. J., SANDERS-BUSH, E., HOFFMAN, B. J. AND HARTIG, P. R. (1986). A unique serotonin receptor in choroid plexus is linked to phosphatidylinositol turnover. *Proc. natn. Acad. Sci. U.S.A.* **83**, 4086–4088.
- DA PRADA, M. AND PICOTTI, G. B. (1979). Content and subcellular localization of catecholamines and 5-hydroxytryptamine in human and animal blood platelets: monoamine distribution between platelets and plasma. *Br. J. Pharmacol.* **65**, 653–662.
- FRIEND, W. G. AND CARTWRIGHT, E. (1963). A practical apparatus for feeding artificial diets to all stages of *Rhodnius prolixus* Stål. *Can. Ent.* **95**, 362–364.
- JULIAS, D. K., HUANG, N., LIVELLI, T. J., AXEL, R. AND JESSELL, T. M. (1990). The 5-HT<sub>2</sub> receptor defines a family of structurally distinct but functionally conserved serotonin receptors. *Proc. natn. Acad. Sci. U.S.A.* **87**, 928–932.
- LANGE, A. B., ORCHARD, I. AND BARRETT, F. M. (1989). Changes in haemolymph serotonin levels associated with feeding in the blood-sucking bug, *Rhodnius prolixus*. *J. Insect Physiol.* **35**, 393–399.
- MADDAIAH, V. T. (1969). A model for hormone specific activation of adenylyl cyclase. *Fedn Proc. Fedn Am. Soc. exp. Biol.* **24**, 1368–1376.
- MADDRELL, S. H. P. (1963). Excretion in the blood-sucking bug, *Rhodnius prolixus* Stål. I. The control of diuresis. *J. exp. Biol.* **40**, 247–256.
- MADDRELL, S. H. P., LANE, N. J., HARRISON, J. B., OVERTON, J. A. AND MORETON, R. B. (1988). The initial stages in the action of an insecticidal  $\delta$ -endotoxin of *Bacillus thuringiensis* var. *israelensis* on the epithelial cells of the Malpighian tubules of *Rhodnius prolixus*. *J. Cell Sci.* **90**, 131–144.
- MADDRELL, S. H. P., PILCHER, D. E. M. AND GARDINER, B. O. C. (1969). Stimulatory effect of 5-hydroxytryptamine (serotonin) on secretion by Malpighian tubules of insects. *Nature* **222**, 784–785.
- MADDRELL, S. H. P., PILCHER, D. E. M. AND GARDINER, B. O. C. (1971). Pharmacology of the Malpighian tubules of *Rhodnius* and *Carausius*: the structure–activity relationship of tryptamine analogues and the role of cyclic AMP. *J. exp. Biol.* **54**, 779–804.
- MONTOREANO, R., TRIANA, F., ABATE, T. AND RANGEL-ALDAO, R. (1990). Cyclic AMP in the Malpighian tubule fluid and in the urine of *Rhodnius prolixus*. *Gen. comp. Endocr.* **77**, 136–142.
- MORGAN, P. J. AND MORDUE, W. (1984). 5-Hydroxytryptamine stimulates fluid secretion in locust Malpighian tubules independently of cAMP. *Comp. Biochem. Physiol.* **79C**, 305–310.
- NICOLSON, S. W. AND MILLAR, R. P. (1983). Effects of biogenic amines and hormones on butterfly Malpighian tubules: dopamine stimulates fluid secretion. *J. Insect Physiol.* **29**, 611–615.

- ORCHARD, I. (1989). Serotonergic neurohaemal tissue in *Rhodnius prolixus*: synthesis, release and uptake of serotonin. *J. Insect Physiol.* **35**, 943–947.
- ORCHARD, I., LANGE, A. B. AND BARRETT, F. M. (1988). Serotonergic supply to the epidermis of *Rhodnius prolixus*: evidence for serotonin as the plasticising factor. *J. Insect Physiol.* **34**, 873–879.
- SKAER, H. LE B., HARRISON, J. B. AND MADDRELL, S. H. P. (1990). Physiological and structural maturation of a polarized epithelium: the Malpighian tubules of a blood-sucking insect, *Rhodnius prolixus*. *J. Cell Sci.* **96**, 537–547.
- SPRING, J. (1990). Endocrine regulation of diuresis in insects. *J. Insect Physiol.* **36**, 13–22.
- TRIMMER, B. A. (1985). Serotonin and the control of salivation in the blowfly *Calliphora*. *J. exp. Biol.* **114**, 307–328.
- VEENSTRA, J. A. (1988). Effects of 5-hydroxytryptamine on the Malpighian tubules of *Aedes aegypti*. *J. Insect Physiol.* **34**, 299–304.
- WHEELER, C. H. AND COAST, G. M. (1990). Assay and characterisation of diuretic factors in insects. *J. Insect Physiol.* **36**, 23–34.
